# Supplementary material
Source: publisher figshare collection journal article supplement (https://diabetesjournals.figshare.com/articles/dataset/_/24498256)

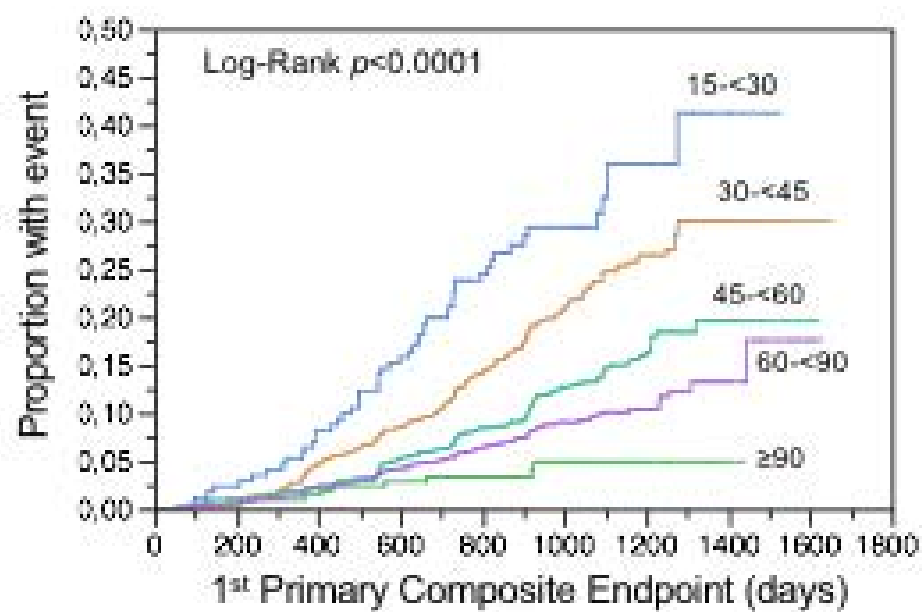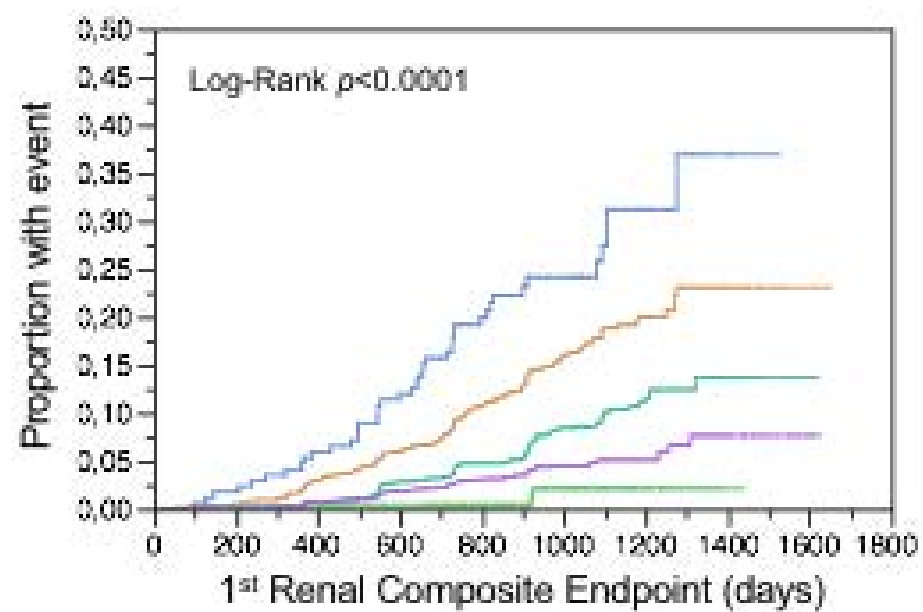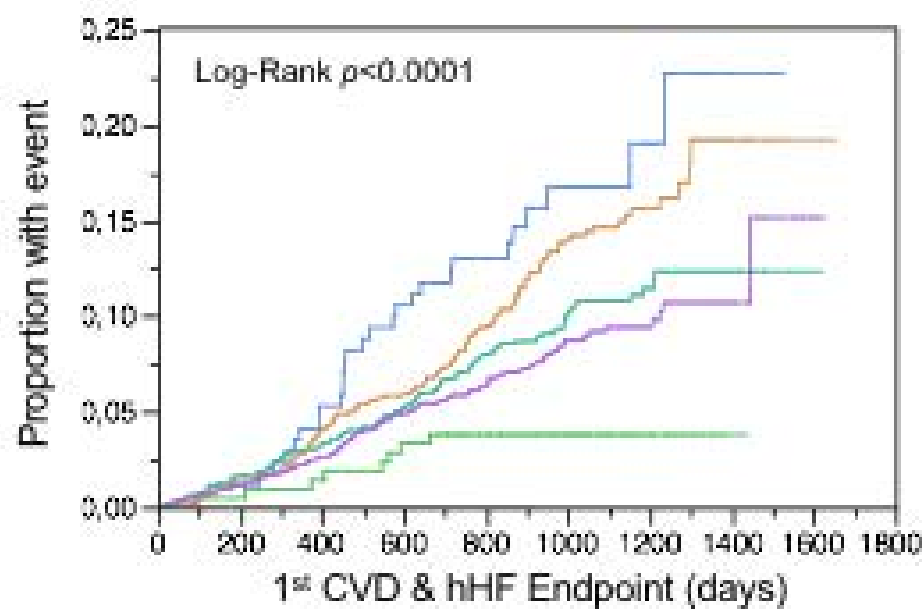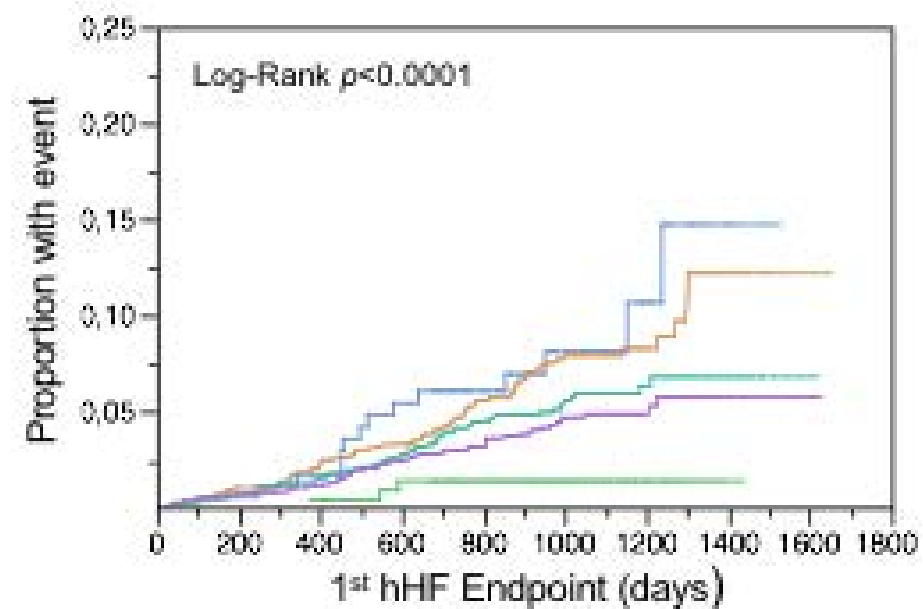

Figure S2

Supplement: Supplementary file 1 [file 1]

## High UACR

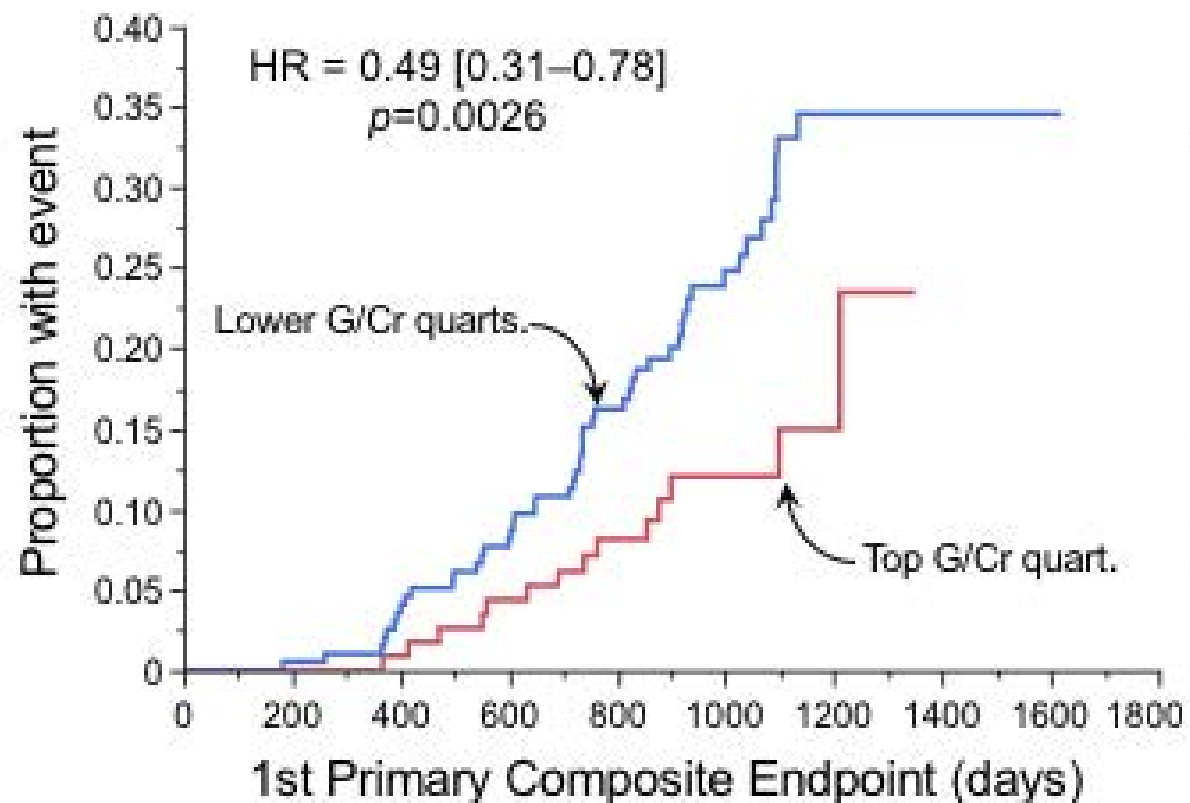

## Lower UACR

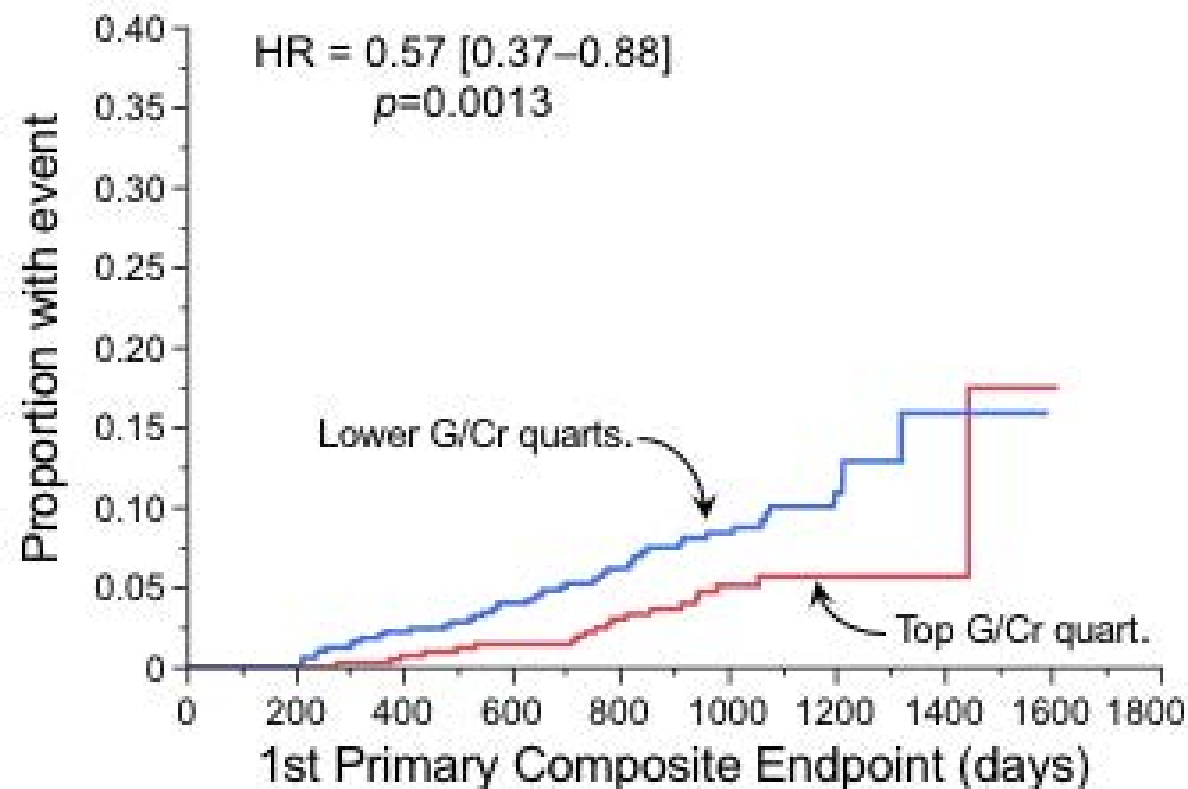

Figure S4

Supplement: Supplementary file 2 [file 1]

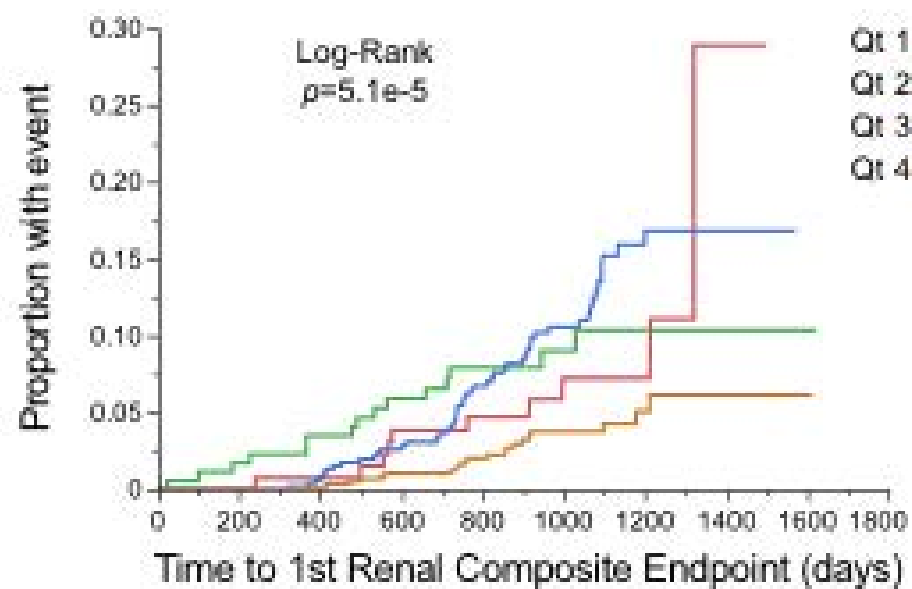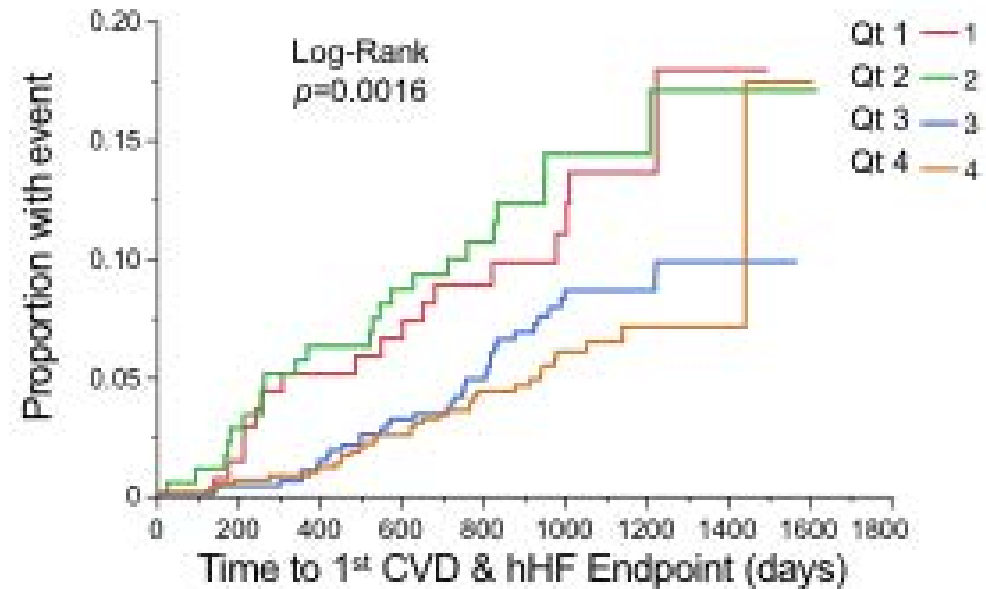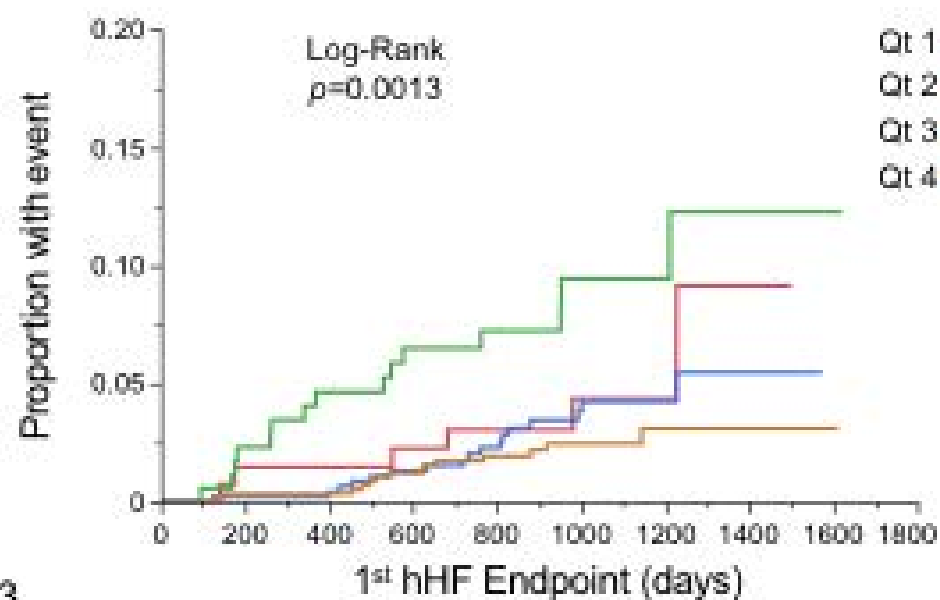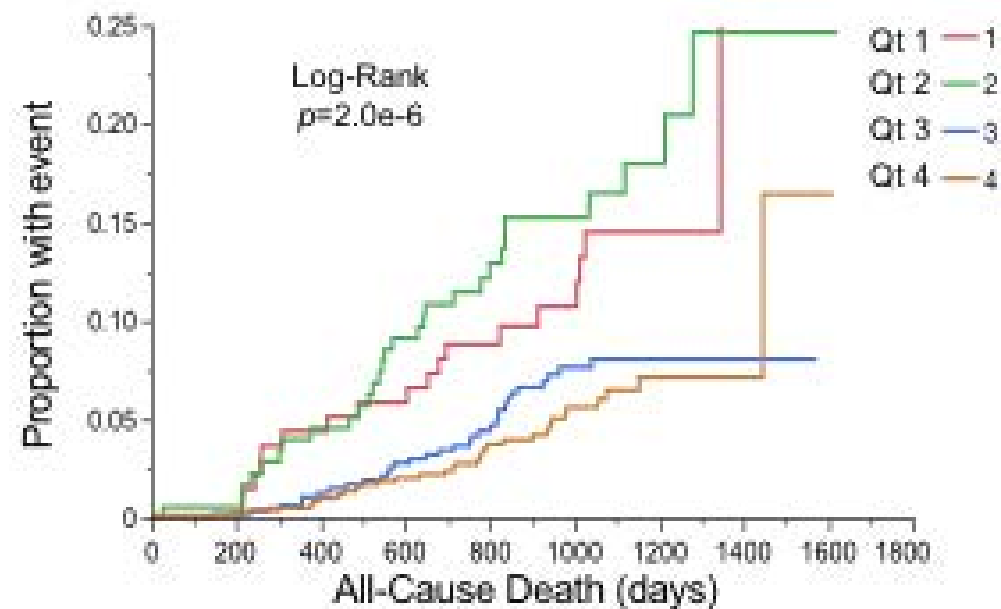

Figure S3

Supplement: Supplementary file 3 [file 1]

## Full CREDENCE (n=4401)

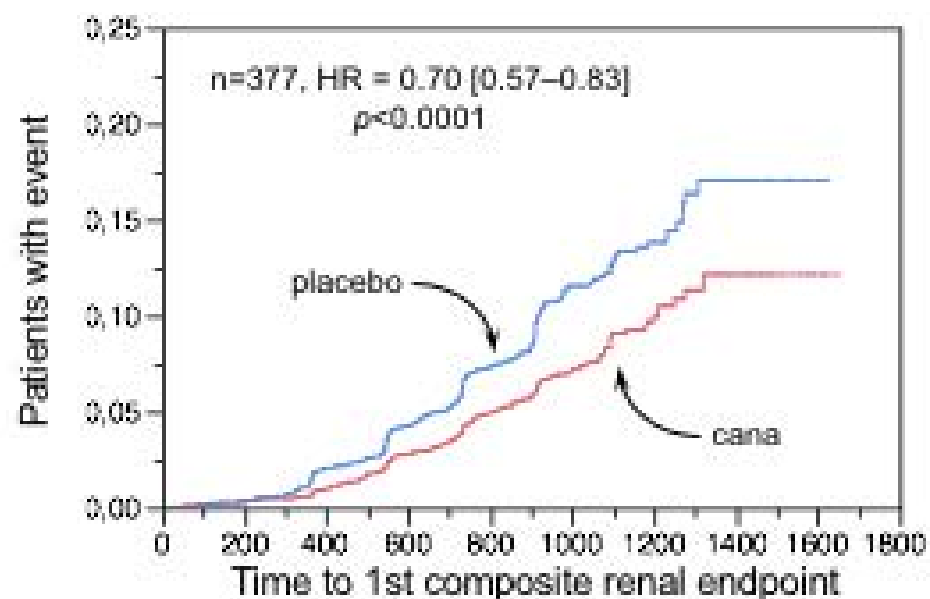

## Reduced CREDENCE (n=2713)

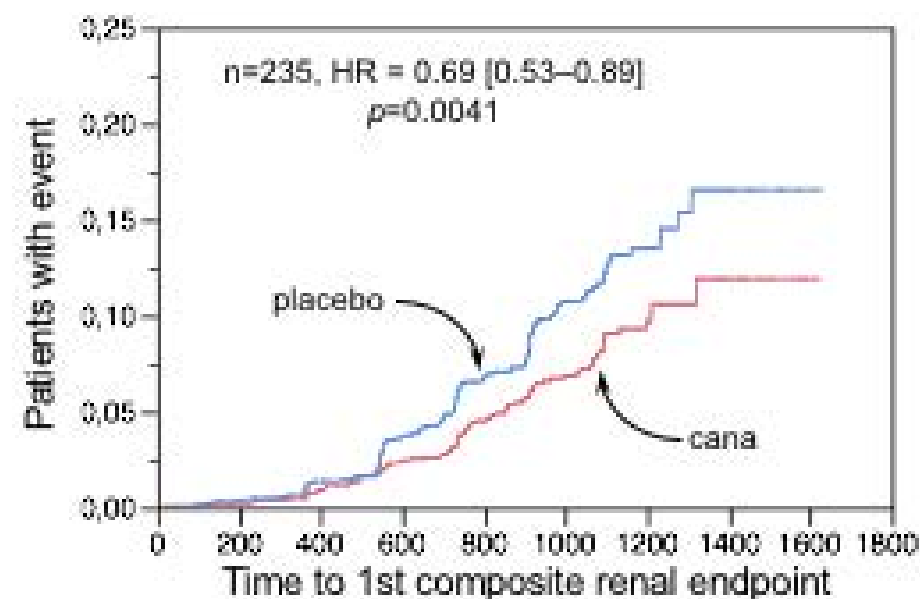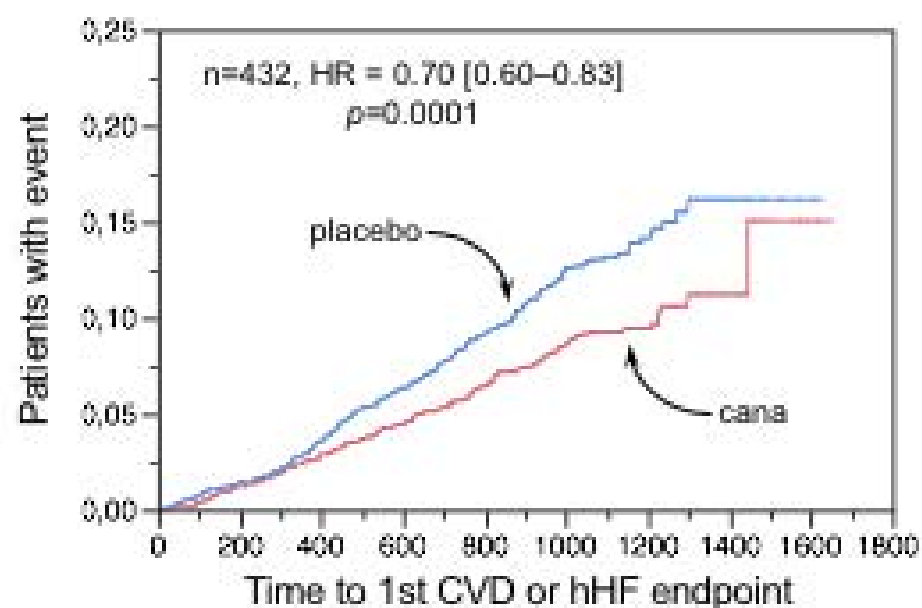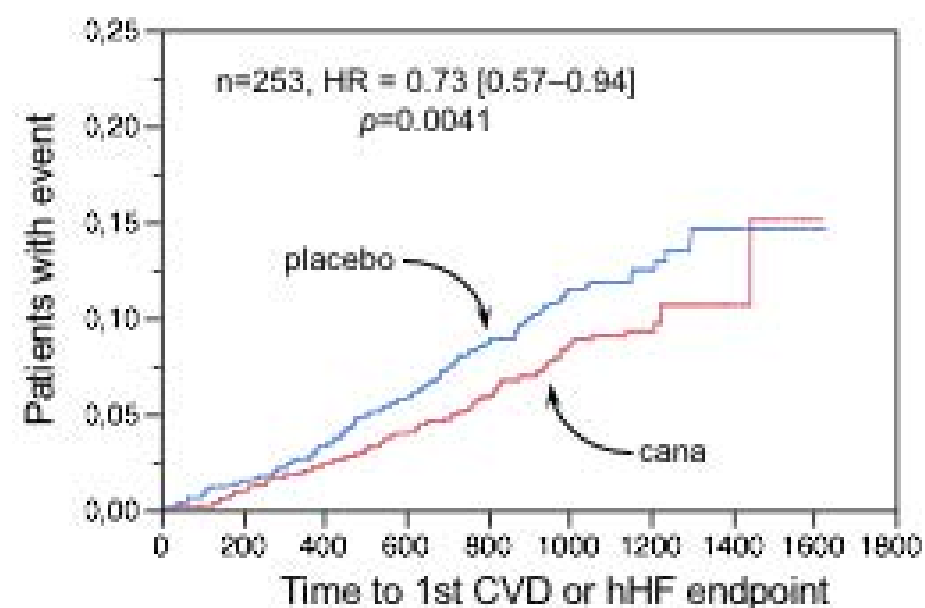

Figure S1

Supplement: Supplementary file 4 [file 1]
